# Supplementary material for: The chemistry of phosphorodiselenoates: structure, catalysis and formation of Se-esters
Source: Royal Society of Chemistry journal article supplement (doi:10.1039/b813267d), 2008-12-11
Supplement: b813267d.pdf [file b813267d.pdf]

## The Chemistry of Phosphorodiselenoates: Structure, Catalysis and Formation of Se-esters

Bijay Sarkar, Chiang-Shiang Fang, Lee-Yan You, and C. W. Liu\*

*Department of Chemistry, National Dong Hwa University,  
Hualien 97401, Taiwan*

### Synthesis and characterization data for compounds 1~7

**General Synthesis of  $[\{H_2N(CH_2)_2(CMe_2)_2CO\}\{Se_2P(OR)_2\}]$ , 1a-b:** The reaction

was carried out simply by stirring dsep ligand in the presence of 22 mol% of Fe

powder in acetone at room temperature. In a typical reaction, to a solution of

$NH_4[Se_2P(O^iPr)_2]$  (1.3 g, 4 mmol) in 50 mL acetone in a Schlenk flask, Fe powder

(0.05 g, 0.90 mmol) was added at room temperature under  $N_2$  and stirred for 12 h. It

was then filtered through celite and evaporated under reduced pressure using vacuum

pump. The solid residue was then washed with hexane and dissolved in ether to filter

it again through celite. Finally it was dried under reduced pressure to get the product

$[\{H_2N(CH_2)_2(CMe_2)_2CO\}\{Se_2P(O^iPr)_2\}]$  (**1a**) as white solid.

$[\{H_2N(CH_2)_2(CMe_2)_2CO\}\{Se_2P(O^iPr)_2\}]$ , (**1a**): Yield: 1.08g (58.7%). Mp. 101 °C

(decomp.). Anal calcd for  $C_{15}H_{32}NO_3PSe_2$  : C 38.9; H 6.96; N 3.02, Found: C 39.0; H

6.99; N 2.97 %.  $^1H$  NMR (300 MHz,  $(CD_3)_2CO$ ,  $\delta$ , ppm): 4.80(m, 2H,  $OCH(CH_3)_2$ ),

3.78(s, br,  $NH_2$ ), 2.77(s, 4H,  $CH_2$ ), 1.59 (s, 12H,  $CH_3$ ), 1.21 (d, 6H, 12H,

$\text{OCH}(\text{CH}_3)_2$ .  $^{31}\text{P}$  NMR (121.49 MHz,  $(\text{CD}_3)_2\text{CO}$ ,  $\delta$ , ppm): 81.5 ( $J_{\text{PSe}} = 741$  Hz).

FAB-MS ( $m/z$ ): 464.7  $[\text{M}+\text{H}]^+$

$[\{\text{H}_2\text{N}(\text{CH}_2)_2(\text{CMe}_2)_2\text{CO}\}\{\text{Se}_2\text{P}(\text{OEt})_2\}]$ , (**1b**): Yield: 1.22 g (69.3%). Mp.

152°C (decomp.). Anal calcd for  $\text{C}_{13}\text{H}_{28}\text{NO}_3\text{PSe}_2$ : C 35.8; H 6.44; N 3.22. Found: C

35.9; H 6.48; N 3.25%.  $^1\text{H}$  NMR (300 MHz,  $(\text{CD}_3)_2\text{CO}$ ,  $\delta$ , ppm): 4.05(m, 4H,

$-\text{OCH}_2\text{CH}_3$ ), 2.77(s, 4H,  $-\text{CH}_2-$ ), 1.63 (s, 12H,  $-\text{C}(\text{CH}_3)_2$ ), 1.3(t,  $^3J_{\text{HH}} = 14\text{Hz}$ , 6H,

$-\text{OCH}_2\text{CH}_3$ );  $^{31}\text{P}$  NMR (121.49 MHz,  $(\text{CD}_3)_2\text{CO}$ ,  $\delta$ , ppm): 86.7 ( $J_{\text{PSe}} = 759\text{Hz}$ ).

### General synthesis of $[\text{CH}\equiv\text{CCH}_2\text{SeP}(\text{Se})(\text{OR})_2]$ , **2a-b**.

In general, alkynylation of dsep ligand was carried out by stirring it with an equimolar amount of propargyl bromide in THF at room temperature. In a typical experiment, to a 20 mL THF solution of  $\text{NH}_4\text{Se}_2\text{P}(\text{O}^i\text{Pr})_2$  (0.30g, 0.93 mmol) propargyl bromide (80% solution in toluene) (100 $\mu\text{L}$ , 0.93mmol) was added and the mixture was stirred at room temperature for 1h under nitrogen atmosphere. The solution was filtered to get rid of  $\text{NH}_4\text{Br}$ . The filtrate was evaporated under vacuum to obtain  $\text{HC}\equiv\text{CCH}_2\text{SeP}(\text{Se})(\text{O}^i\text{Pr})_2$  (**2a**) as yellowish green oils.

**$\text{HC}\equiv\text{CCH}_2\text{SeP}(\text{Se})(\text{O}^i\text{Pr})_2$  (**2a**)**. Yield: 0.37g (79.0%). Anal. Calcd for  $\text{C}_9\text{H}_{17}\text{O}_3\text{PSe}_2$ :

C, 31.23; H, 4.95. Found: C, 31.06; H, 4.67; IR (KBr,  $\text{cm}^{-1}$ ): 3290 ( $\nu_{\text{CH}}$ ), 2107( $\nu_{\text{C}\equiv\text{C}}$ ).

$^1\text{H}$  NMR (300 MHz,  $\text{CDCl}_3$ ,  $\delta$ , ppm): 4.87(m, 2H,  $-\text{CH}(\text{CH}_3)_2$ ), 3.53 (dd,  $^3J_{\text{PH}} = 12.9$ ,

$^4J_{\text{HH}} = 2.7$ , 2H,  $-\text{SeCH}_2\text{C}\equiv\text{CH}$ ), 2.28 (t,  $^4J_{\text{HH}} = 2.7$ , 1H,  $-\text{CH}_2\text{C}\equiv\text{CH}$ ), 1.37 (d,  $^3J_{\text{HH}} =$

6.3 Hz, 6H,  $-\text{CH}(\text{CH}_3)_2$ );  $^{13}\text{C}$  NMR (75.5 MHz,  $\text{CDCl}_3$ ,  $\delta$ , ppm): 79.7 (d,  $J_{\text{CP}} = 6.4$  Hz), 74.4 (d,  $J_{\text{CP}} = 6.4$  Hz), 72.8, 23.6 (d,  $J_{\text{CP}} = 9.3$  Hz), 16.3 (d,  $J_{\text{CP}} = 3.8$  Hz);  $^{31}\text{P}$  NMR (121.5 MHz,  $\text{CDCl}_3$ ,  $\delta$ , ppm): 77.7 ( $J_{\text{PSe}} = 891.4$ , 469.9 Hz);  $^{77}\text{Se}$  NMR (57.2 MHz,  $\text{CDCl}_3$ ,  $\delta$ , ppm): 418.8 (d,  $J_{\text{SeP}} = 469.4$  Hz), -88.4 ( $J_{\text{SeP}} = 891.6$  Hz).

MALDI-TOF : 385.09  $[\text{M}+\text{K}^+]$ .

**$\text{HC}\equiv\text{CCH}_2\text{SeP}(\text{Se})(\text{OEt})_2$  (2b).** A similar procedure described above was adopted

except that  $(\text{NH}_4)\text{Se}_2\text{P}(\text{OEt})_2$  was used instead of  $(\text{NH}_4)\text{Se}_2\text{P}(\text{O}^i\text{Pr})_2$ . Yield: 0.33g

(77.1%). IR (KBr,  $\text{cm}^{-1}$ ): 3310( $\nu_{\text{CH}}$ ), 2212( $\nu_{\text{C}\equiv\text{C}}$ )..  $^1\text{H}$  NMR (300 MHz,  $\text{CDCl}_3$ ,  $\delta$ , ppm):

4.21 (m, 4H,  $-\text{OCH}_2\text{CH}_3$ ), 3.47 (dd,  $^3J_{\text{PH}} = 12.9$  Hz,  $^4J_{\text{HH}} = 2.7$  Hz, 2H,

$-\text{SeCH}_2\text{C}\equiv\text{CH}$ ), 2.30 (t,  $^4J_{\text{HH}} = 2.7$  Hz, 1H,  $-\text{CH}_2\text{C}\equiv\text{CH}$ ), 1.39 (t,  $^3J_{\text{HH}} = 7.1$  Hz, 6H,

$-\text{OCH}_2\text{CH}_3$ );  $^{13}\text{C}$  NMR (75.5 MHz,  $\text{CDCl}_3$ ,  $\delta$ , ppm): 79.8 (d,  $J_{\text{CP}} = 5.3$  Hz), 72.6, 64.6

(d,  $J_{\text{CP}} = 5.2$  Hz), 15.9 (d,  $J_{\text{CP}} = 4.0$  Hz), 15.7 (d,  $J_{\text{CP}} = 8.7$  Hz);  $^{31}\text{P}$  NMR (121.5 MHz,

$\text{CDCl}_3$ ,  $\delta$ , ppm): 82.9 ( $J_{\text{PSe}} = 896.6$ , 478.9 Hz);  $^{77}\text{Se}$  NMR (57.2 MHz,  $\text{CDCl}_3$ ,  $\delta$ , ppm):

388.02 (d,  $J_{\text{SeP}} = 478.6$  Hz), -93.7 (d,  $J_{\text{SeP}} = 896.9$  Hz). MALDI-TOF: 318.04 $[\text{M}^+]$ .

### General procedure for synthesis of $[\text{CH}_3\text{C}(\text{O})\text{SeP}(\text{Se})(\text{OR})_2]$ , 3.

A suspension of  $(\text{NH}_4)\text{Se}_2\text{P}(\text{OR})_2$  in THF was stirred with acetyl chloride at room temperature under inert atmosphere to obtain the products as pale green oils. In a typical experiment, to a suspension of  $\text{NH}_4\text{Se}_2\text{P}(\text{O}^i\text{Pr})_2$  (0.44g, 1.35mmol) in 20 mL THF was added acetyl chloride (100 $\mu\text{L}$ , 1.38mmol) and the mixture was stirred at

room temperature for 1h under a nitrogen atmosphere. The reaction mixture was then evaporated to dryness at room temperature using vacuum. The residue was dissolved in 20 mL CH<sub>2</sub>Cl<sub>2</sub> and filtered to get rid of the salt formed. The filtrate was evaporated under vacuum to obtain CH<sub>3</sub>C(O)SeP(Se)(O<sup>*i*</sup>Pr)<sub>2</sub> (**3a**) as a greenish yellow oil.

**CH<sub>3</sub>C(O)SeP(Se)(O<sup>*i*</sup>Pr)<sub>2</sub> (**3a**).** Yield: 0.37g (76.71%). Anal. Calcd for

C<sub>8</sub>H<sub>17</sub>O<sub>3</sub>PSe<sub>2</sub>·CH<sub>2</sub>Cl<sub>2</sub>: C, 24.80; H, 4.40. Found: C, 24.81; H, 4.75.; <sup>1</sup>H NMR (300

MHz, CDCl<sub>3</sub>, δ, ppm): 4.98 (m, 2H, -CH(CH<sub>3</sub>)<sub>2</sub>), 2.51 (d, <sup>4</sup>J<sub>HP</sub> = 2.1 Hz, 3H, CH<sub>3</sub>CO-),

1.36 (t, <sup>3</sup>J<sub>HH</sub> = 6.3 Hz, 6H, -CH(CH<sub>3</sub>)<sub>2</sub>); <sup>13</sup>C NMR (75.48 MHz, CDCl<sub>3</sub>, δ, ppm):

193.5 (d, J<sub>CP</sub> = 5.8 Hz), 75.2 (d, J<sub>CP</sub> = 6.4 Hz), 36.3, 23.7 (d, J<sub>CP</sub> = 4.5 Hz), 23.2 (d,

J<sub>CP</sub> = 5.1 Hz); <sup>31</sup>P NMR (121.49 MHz, CDCl<sub>3</sub>, δ, ppm): 66.6 (J<sub>PSe</sub> = 889.1, 466.6 Hz);

<sup>77</sup>Se NMR (57.24MHz, CDCl<sub>3</sub>, δ, ppm): 729.7 (d, J<sub>SeP</sub> = 466.6 Hz), -40.3 (d, J<sub>SeP</sub> =

889.7Hz). MALDI-TOF: 389.30 [M+K<sup>+</sup>]. IR (KBr, cm<sup>-1</sup>): 1736 (ν<sub>CO</sub>).

**CH<sub>3</sub>C(O)SeP(Se)(OEt)<sub>2</sub> (**3b**).** Yield: 0.38g (82.9%). <sup>1</sup>H NMR (300 MHz, CDCl<sub>3</sub>, δ,

ppm): 4.26 (m, 4H, -OCH<sub>2</sub>CH<sub>3</sub>), 2.52 (d, <sup>3</sup>J<sub>PH</sub> = 2.0 Hz, 3H, CH<sub>3</sub>CO-), 1.40 (t, <sup>3</sup>J<sub>H-H</sub> =

7.1 Hz, 6H, -OCH<sub>2</sub>CH<sub>3</sub>); <sup>13</sup>C NMR (75.5 MHz, CDCl<sub>3</sub>, δ, ppm): 192.6 (d, J<sub>CP</sub> = 5.9

Hz), 65.3 (d, J<sub>CP</sub> = 5.6 Hz), 36.4, 15.7 (d, J<sub>CP</sub> = 8.48 Hz); <sup>31</sup>P NMR (121.5 MHz,

CDCl<sub>3</sub>, δ, ppm): 72.0 (J<sub>PSe</sub> = 896.2, 473.1 Hz); <sup>77</sup>Se NMR (57.2 MHz, CDCl<sub>3</sub>, δ, ppm):

690.8 (d, J<sub>SeP</sub> = 474.5 Hz), -44.3 (d, J<sub>SeP</sub> = 897.9 Hz). MALDI-TOF: 322.109 [M<sup>+</sup>], IR

(KBr, cm<sup>-1</sup>): 1726 (ν<sub>CO</sub>).

**Synthesis of  $[(^i\text{PrO})_2\text{P}(\text{Se})\text{Se}(\text{CH}_2)_3\text{SeP}(\text{Se})(\text{O}^i\text{Pr})_2]$ , 4.** 1,3-Dibromopropane (25  $\mu\text{L}$ , 0.25 mmol) was added to a 10 mL THF solution of  $[(\text{NH}_4)\text{Se}_2\text{P}(\text{O}^i\text{Pr})_2]$  (0.16 g, 0.50mmol) in a Schlenk flask and stirred for 8h under  $\text{N}_2$  atmosphere. The reaction mixture was filtered to get rid of the salt formed during the reaction. The solvent was evaporated under vacuum at room temperature to obtain the product as colorless oil. Yield: 0.14g (88 %); Anal. Calcd for  $\text{C}_{15}\text{H}_{34}\text{O}_4\text{P}_2\text{Se}_4$ : C, 27.45; H, 5.22; Found ; C, 27.76; H, 5.17;  $^1\text{H}$  NMR (300 MHz,  $\text{CDCl}_3$ ,  $\delta$ , ppm): 4.84 (m, 4H,  $-\text{OCH}-$ ), 3.00 (m, 4H,  $\text{Se}-\text{CH}_2-\text{CH}_2-\text{CH}_2-\text{Se}$ ), 2.25 (m, 2H,  $-\text{CH}_2\text{CH}_2\text{CH}_2-$ ), 1.34 (d,  $^3J_{\text{HH}} = 6.3$  Hz, 24H);  $^{13}\text{C}$  NMR (75.5 MHz,  $\text{CDCl}_3$ ,  $\delta$ , ppm): 74.4 (d,  $J_{\text{CP}} = 7.1$  Hz), 31.4 (d,  $J = 3.9\text{Hz}$ ), 31.2, 23.5 (d,  $J_{\text{CP}} = 21.5$  Hz);  $^{31}\text{P}$  NMR (121.5 MHz,  $\text{CDCl}_3$ ,  $\delta$ , ppm): 79.7 ( $J_{\text{PSe}} = 884.9$ , 480.7Hz);  $^{77}\text{Se}$  NMR (57.2 MHz,  $\text{CDCl}_3$ ,  $\delta$ , ppm): 352.7 (d,  $J_{\text{SeP}} = 480.7\text{Hz}$ ), -90.1 (d,  $J_{\text{SeP}} = 885.1$  Hz),; MALDI-TOF MS: 680.36  $[\text{M}+\text{Na}^+]$ .

**General synthesis of  $[\text{1,2-(OH)C}_6\text{H}_{10}\{\text{SeP}(\text{Se})(\text{OR})_2\}]$ , 5a-b.**

The synthesis was carried out by stirring dsep ligand  $\text{NH}_4\text{Se}_2\text{P}(\text{OR})_2$  in THF with cyclohexene oxide at room temperature under nitrogen atmosphere. In a typical reaction, to a suspension of  $\text{NH}_4\text{Se}_2\text{P}(\text{O}^i\text{Pr})_2$  (0.40g, 1.23 mmol) in 20 mL of THF was added cyclohexene oxide (100 $\mu\text{L}$ , 1.38mmol) and the mixture was stirred at room temperature for 3h under a nitrogen atmosphere. Then the reaction mixture was

evaporated to dryness. The resulting solution was vacuum-dried to obtain 1,

2-(OH)C<sub>6</sub>H<sub>10</sub>{SeP(Se)(O<sup>*i*</sup>Pr)<sub>2</sub>} (**5a**) as a pale green oil.

**[1,2-(OH)C<sub>6</sub>H<sub>10</sub>{SeP(Se)(O<sup>*i*</sup>Pr)<sub>2</sub>}], 5a.** Yield: 0.24g (48.8%). Anal. Calcd for

C<sub>12</sub>H<sub>25</sub>O<sub>3</sub>PSe<sub>2</sub>: C, 35.48; H, 6.20; Found: C, 35.65; H, 6.17; IR (KBr, cm<sup>-1</sup>): 3400 (br, ν<sub>CH</sub>); <sup>1</sup>H NMR (300 MHz, CDCl<sub>3</sub>, δ, ppm): 4.82 (m, 2H, -OCH(CH<sub>3</sub>)<sub>2</sub>), 3.52 (m, 1H, -CH<sub>2</sub>CH(OH)CH-), 3.19 (m, 1H, -CH<sub>2</sub>CH(Se)CH-), 2.68 (s, 1H, -CHOH), 2.04-2.27 (m, 2H, cyclohexane ring), 1.63-1.69 (m, 3H, cyclohexane ring), 1.29 (m, 15H, -CH<sub>3</sub> + cyclohexane); <sup>13</sup>C NMR (75.5 MHz, CDCl<sub>3</sub>, δ, ppm): 74.7 (d, J<sub>CP</sub> = 7.5 Hz), 73.4 (d, J<sub>CP</sub> = 3.5 Hz), 58.5 (d, J<sub>CP</sub> = 4.2 Hz), 34.9, 33.7 (d, J<sub>CP</sub> = 4.6 Hz), 26.9, 24.1, 23.6 (d, J<sub>CP</sub> = 19.7 Hz); <sup>31</sup>P NMR (121.5 MHz, CDCl<sub>3</sub>, δ, ppm): 78.6 (J<sub>PSe</sub> = 879.8, 490.9); <sup>77</sup>Se NMR (57.2 MHz, CDCl<sub>3</sub>, δ, ppm): 422.3 (J<sub>SeP</sub> = 490.6), -70.6 (J<sub>SeP</sub> = 880.6).  
MALDI-TOF: 429.24 [M+Na<sup>+</sup>].

**[1, 2-(OH)C<sub>6</sub>H<sub>10</sub>{SeP(Se)(OEt)<sub>2</sub>}], 5b.** Similar reaction carried out with

(NH<sub>4</sub>)Se<sub>2</sub>P(OEt)<sub>2</sub> instead of NH<sub>4</sub>Se<sub>2</sub>P(O<sup>*i*</sup>Pr)<sub>2</sub>. The reaction was continued for 6 hours.

Yield: 0.18g (38.8%). IR (KBr, cm<sup>-1</sup>): 3400 (br ν<sub>CH</sub>); <sup>1</sup>H NMR (300 MHz, CDCl<sub>3</sub>, δ, ppm): 4.11 (m, 4H, -OCH<sub>2</sub>CH<sub>3</sub>), 3.48 (m, 1H, -CH<sub>2</sub>CH(OH)CH-), 3.33 (m, 1H, -CH<sub>2</sub>CH(Se)CH-), 3.04-3.15 (m, 2H, cyclohexane ring), 1.49-2.42 (m, 7H, cyclohexane ring), 1.29 (m, 12H, -CH<sub>2</sub>CH<sub>3</sub>); <sup>13</sup>C NMR (75.5 MHz, CDCl<sub>3</sub>, δ, ppm): 73.1 (d, J<sub>CP</sub> = 3.6 Hz), 64.8 (d, J<sub>CP</sub> = 9.1 Hz), 58.4 (d, J<sub>CP</sub> = 3.8 Hz), 35.0, 34.1 (d, J<sub>CP</sub>

= 16.2 Hz), 26.8, 24.1, 15.6 (d,  $J_{CP}$  = 8.7 Hz);  $^{31}\text{P}$  NMR (121.5 MHz,  $\text{CDCl}_3$ ,  $\delta$ , ppm): 83.8 ( $J_{PSe}$  = 886.5, 500.1 Hz);  $^{77}\text{Se}$  NMR (57.2 MHz,  $\text{CDCl}_3$ ,  $\delta$ , ppm): 379.4 (d,  $J_{SeP}$  = 503.7 Hz), -75.3 (d,  $J_{SeP}$  = 887.2 Hz). MALDI-TOF: 379.04  $[\text{M}+\text{H}^+]$ .

**Synthesis of  $[\text{CH}_3\text{COCH}_2\text{CH}_2\text{SeP}(\text{Se})(\text{O}^i\text{Pr})_2]$ , **6**.** To a solution of  $\text{NH}_4\text{Se}_2\text{P}(\text{O}^i\text{Pr})_2$  (0.44g, 1.35mmol) in 20 mL of THF was added but-3-en-2-one (100 $\mu\text{L}$ , 1.35 mmol) and stirred at room temperature for 8h under nitrogen atmosphere. Then the solvent and the excess of but-3-en-2-one were removed under vacuum. The compound was isolated by preparative TLC by using 5% EA in hexane. After running the solvent TLC plate showed 4 spots were isolated and the second spot from the top was the desired compound. After cutting the silica gel from the TLC plate,  $\text{CH}_2\text{Cl}_2$  was added to dissolve it and filtered to isolate the product to obtain greenish yellow oil.

**$[\text{CH}_3\text{COCH}_2\text{CH}_2\text{SeP}(\text{Se})(\text{O}^i\text{Pr})_2]$ , **6**.** Yield: 0.15g (29.8%). Anal. Calcd. for  $\text{C}_{10}\text{H}_{21}\text{O}_3\text{PSe}_2 \cdot 0.5\text{CH}_2\text{Cl}_2$ : C, 30.53; H, 5.37; Found: C, 30.70; H, 5.43. IR (KBr,  $\text{cm}^{-1}$ ): 1718 ( $\nu_{\text{CO}}$ ).  $^1\text{H}$  NMR (300 MHz,  $\text{CDCl}_3$ ,  $\delta$ , ppm): 4.84 (m, 2H,  $-\text{CH}(\text{CH}_3)_2$ ), 3.06(m, 4H,  $\text{CH}_3\text{COCH}_2\text{CH}_2-$ ), 2.16(s, 3H,  $\text{CH}_3\text{COCH}_2\text{CH}_2-$ ), 1.35 (m, 6H,  $-\text{CH}(\text{CH}_3)_2$ );  $^{13}\text{C}$  NMR (75.5 MHz,  $\text{CDCl}_3$ ,  $\delta$ , ppm): 206.8, 74.4 (d,  $J_{CP}$  = 7.2 Hz), 44.2 (d,  $J_{CP}$  = 2.4 Hz), 30.0, 24.2 (d,  $J_{CP}$  = 3.8 Hz), 23.6 (d,  $J_{CP}$  = 4.3 Hz);  $^{31}\text{P}$  NMR (121.5 MHz,  $\text{CDCl}_3$ ,  $\delta$ , ppm):  $\delta$  80.5 ( $J_{PSe}$  = 884.7, 448.4 Hz);  $^{77}\text{Se}$  NMR (57.2 MHz,  $\text{CDCl}_3$ ,  $\delta$ , ppm): 377.9 (d,  $J_{SeP}$  = 477.9 Hz), -93.5 (d,  $J_{SeP}$  = 882.6 Hz). MALDI-TOF: 379.22  $[\text{M}+\text{H}]^+$ .

### General synthesis of [EtO<sub>2</sub>CCH=CHSeP(Se)(OR)<sub>2</sub>], **7a-b**.

Michael addition type reactions of NH<sub>4</sub>Se<sub>2</sub>P(OR)<sub>2</sub> on ethyl propiolate were carried out by stirring the reactants at room temperature in THF under N<sub>2</sub> atmosphere. In a typical reaction, to a suspension of NH<sub>4</sub>Se<sub>2</sub>P(O<sup>*i*</sup>Pr)<sub>2</sub> (0.40g, 1.23mmol) in 20 mL of THF, was added ethyl propiolate (130μl, 1.24mmol) and the mixture was stirred at room temperature for 8h under nitrogen atmosphere. Then the reaction mixture was evaporated to dryness at room temperature under vacuum to obtain the product EtO<sub>2</sub>CCH=CHSeP(Se)(O<sup>*i*</sup>Pr)<sub>2</sub> (**7a**) as a yellowish green oil.

[EtO<sub>2</sub>CCH=CHSeP(Se)(O<sup>*i*</sup>Pr)<sub>2</sub>], **7a**. Yield: 0.33g (66.1%). <sup>1</sup>H NMR (300 MHz, CDCl<sub>3</sub>, δ, ppm): 7.79 (dd, <sup>3</sup>J<sub>HH</sub> = 9.48 Hz, <sup>3</sup>J<sub>PH</sub> = 17.79 Hz, 1H, -SeCH=CHCO), 6.45(d, 0.92 H, <sup>3</sup>J<sub>HH</sub> = 9.51Hz, -SeCH=CHCO), 6.26 (d, <sup>3</sup>J<sub>HH</sub> = 15.85 Hz, 0.08H, -SeCH=CHCO), 4.80 (m, 2H, -CH(CH<sub>3</sub>)<sub>2</sub>), 4.18 (m, 2H, CH<sub>3</sub>CH<sub>2</sub>O-), 1.3 (m, 12H, -CH(CH<sub>3</sub>)<sub>2</sub>); <sup>13</sup>C NMR (75.5 MHz, CDCl<sub>3</sub>, δ, ppm): 166.8, 144.5, 119.3 (d, J<sub>CP</sub> = 6.3 Hz), 74.7 (d, J<sub>CP</sub> = 6.3 Hz), 60.8 (d, J<sub>CP</sub> = 13.3 Hz), 23.5(d, J<sub>CP</sub> = 24.2 Hz), 14.3; <sup>31</sup>P NMR (121.5 MHz, CDCl<sub>3</sub>, δ, ppm): 82.3 (J<sub>PSe</sub> = 894.3, 418.1 Hz); <sup>77</sup>Se NMR (57.2 MHz, CDCl<sub>3</sub>, δ, ppm): 412.8 (d, J<sub>SeP</sub> = 418.3 Hz), -82.4 (d, J<sub>SeP</sub> = 894.2 Hz). IR (KBr, cm<sup>-1</sup>): 1716 (ν<sub>CO</sub>). MALDI-TOF: 445.27 [M+K<sup>+</sup>].

[EtO<sub>2</sub>CCH=CHSeP(Se)(OEt)<sub>2</sub>], **7b**. The product obtained in a similar reaction as described before while NH<sub>4</sub>Se<sub>2</sub>P(OEt)<sub>2</sub> was used instead of (NH<sub>4</sub>)Se<sub>2</sub>P(O<sup>*i*</sup>Pr)<sub>2</sub>. The



reaction was completed in 8h. Yield: 0.37g (80.1%). Anal. Calcd for  $C_9H_{17}O_4PSe_2$ : C, 28.59; H, 4.53; Found: C 28.80; H 4.53.  $^1H$  NMR (300 MHz,  $CDCl_3$ ,  $\delta$ , ppm): 7.78 (dd,  $^3J_{HH} = 9.54$  Hz,  $^3J_{PH} = 17.64$  Hz, 1H, -SeCH=CHCO ), 6.48(d,  $J_{HH} = 9.54$  Hz, 0.98 H, -SeCH=CHCO ), 6.28 (d,  $^3J_{HH} = 15.90$  Hz, 0.02 H, -SeCH=CHCO ), 4.25-4.03 (m, 4H, -POCH<sub>2</sub>CH<sub>3</sub>, -CO<sub>2</sub>CH<sub>2</sub>CH<sub>3</sub>), 1.34 (t,  $^3J_{HH} = 7.11$  Hz, 6H, -POCH<sub>2</sub>CH<sub>3</sub>), 1.28 (t,  $^3J_{HH} = 7.14$  Hz, 3H, -CO<sub>2</sub>CH<sub>2</sub>CH<sub>3</sub>);  $^{13}C$  NMR (75.5 MHz,  $CDCl_3$ ,  $\delta$ , ppm): 166.7, 144.1, 119.6 (d,  $J_{CP} = 6.4$  Hz), 64.9 (d,  $J_{CP} = 5.6$  Hz), 60.9, 15.6(d,  $J_{CP} = 8.4$  Hz), 14.3;  $^{31}P$  NMR (121.5 MHz,  $CDCl_3$ ,  $\delta$ , ppm): 88.6 ( $J_{PSe} = 900.9$ , 422.6 Hz);  $^{77}Se$  NMR (57.2 MHz,  $CDCl_3$ ,  $\delta$ , ppm): 497.7 (d,  $J_{SeP} = 422.3$  Hz), -111.1 (d,  $J_{SeP} = 904.0$  Hz). IR (KBr,  $cm^{-1}$ ): 1726 ( $\nu_{CO}$ ). MALDI-TOF: 401.41  $[M+Na]^+$ .
